# Supplementary material for: Restricted binding of a model protein on C3N4nanosheets suggests an adequate biocompatibility of the nanomaterial
Source: Royal Society of Chemistry journal article supplement (doi:10.1039/d0ra10125g), 2021-01-01
Supplement: d0ra10125g1.pdf [file d0ra10125g1.pdf]

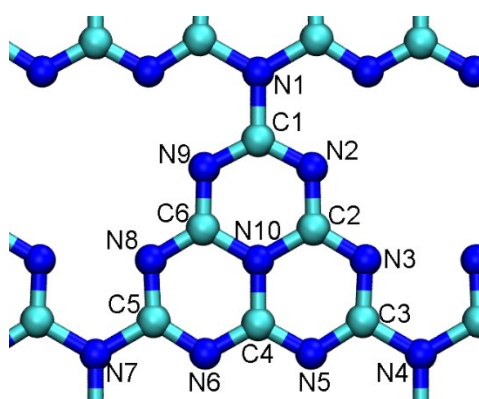

| atom name         | charge  | Leonard-Jones parameters |                     |
|-------------------|---------|--------------------------|---------------------|
|                   |         | $\sigma$ (nm)            | $\epsilon$ (kJ/mol) |
| C2,C4,C6          | 0.4498  | 0.34                     | 0.360               |
| C1,C3,C5          | 0.6246  |                          |                     |
| N2,N3,N5,N6,N8,N9 | -0.5402 | 0.325                    | 0.711               |
| N1,N4,N7          | -0.2328 |                          |                     |
| N10               | 0.2508  |                          |                     |

Figure S1. Force field parameters of  $C_3N_4$ .

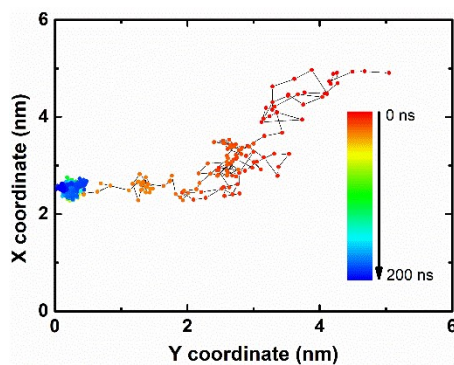

Figure S2. CoM track of the  $\lambda$ -repressor protein when bound to a non-charged  $C_3N_4$  nanosheet.

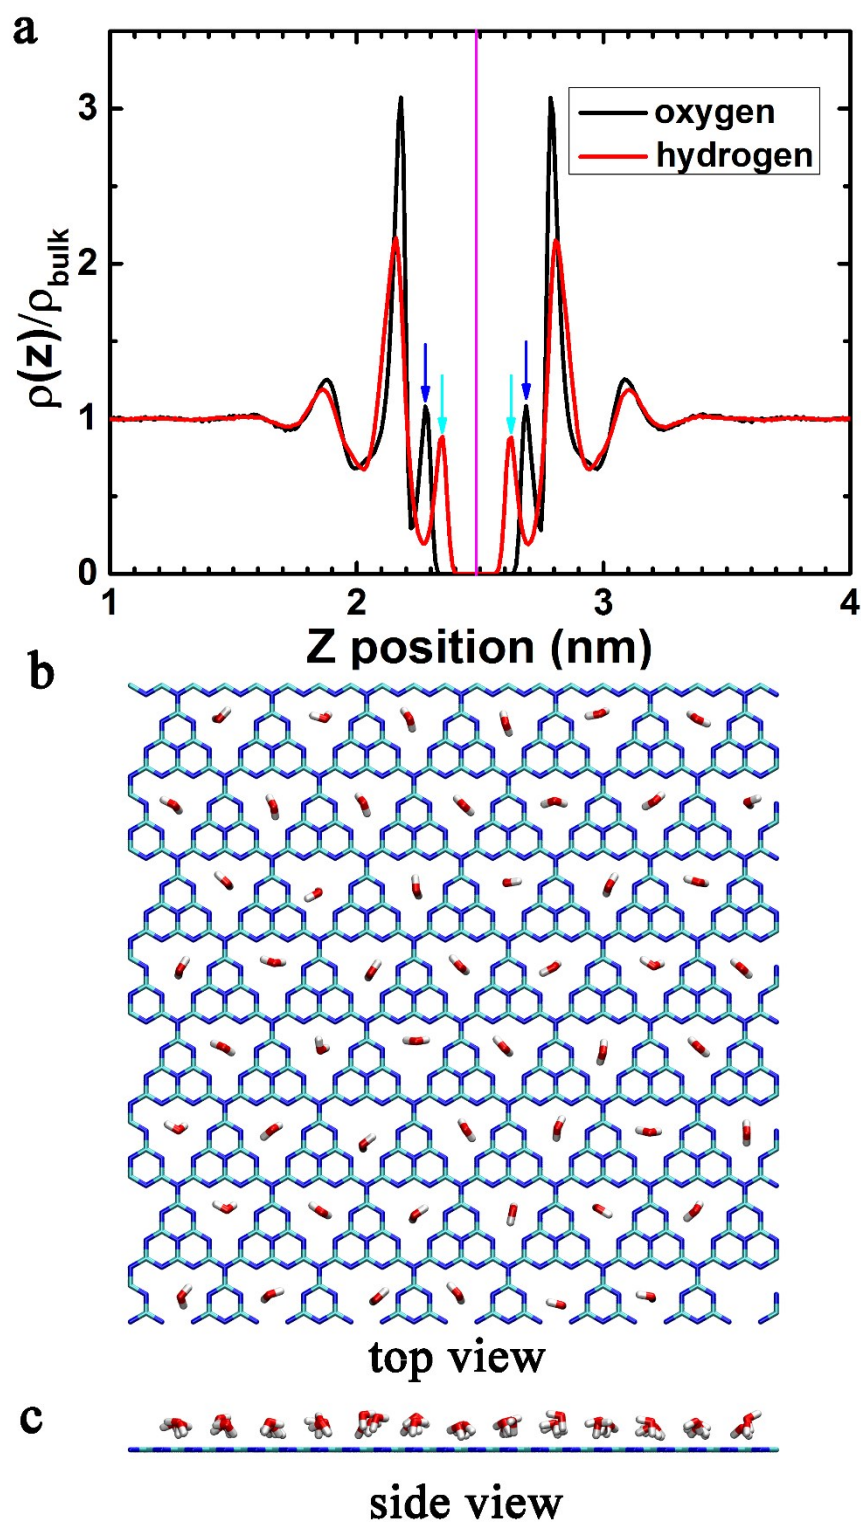

Figure S3. Water distribution on C3N4 nanosheet. (a) Axial distribution of water molecules (including the hydrogens and oxygens of waters) on C3N4 nanosheet. (b-c) Top and side views of the specific water molecule layer.

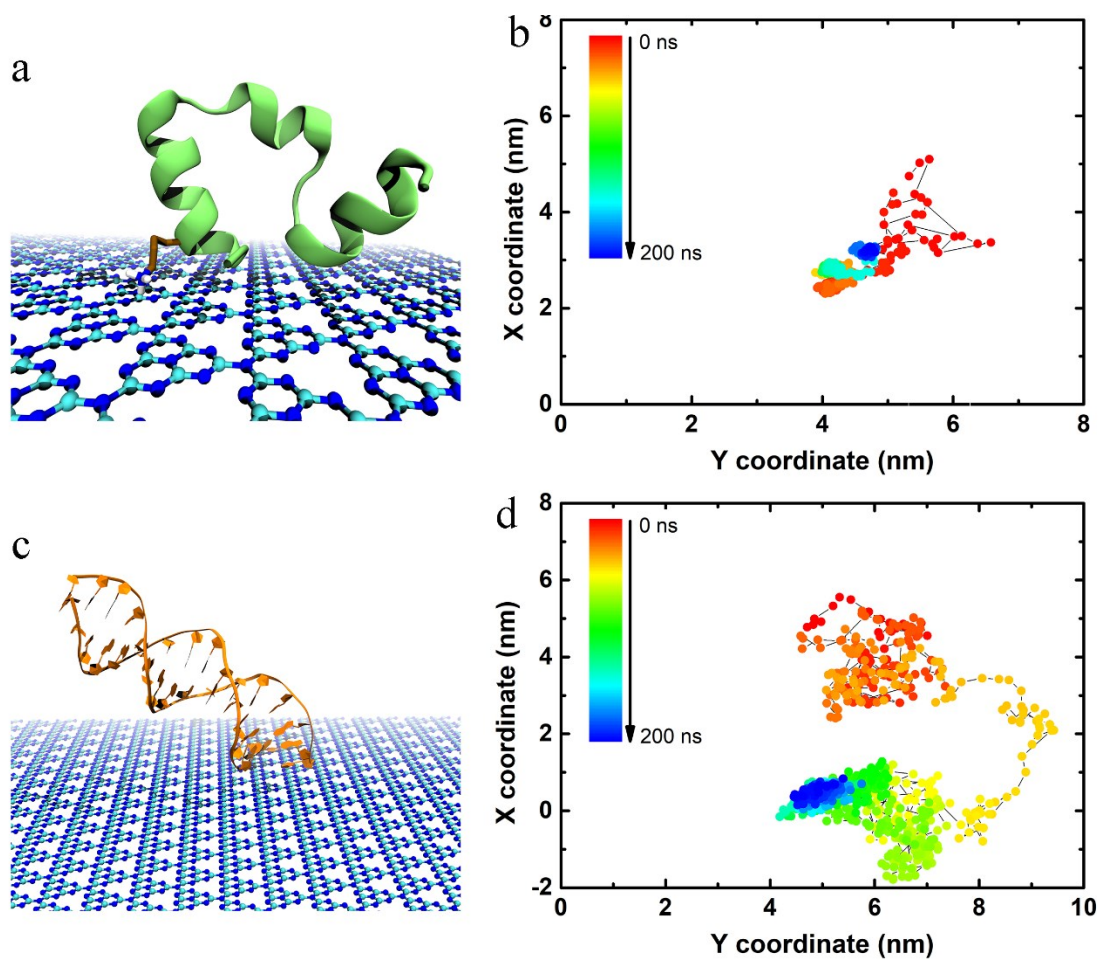

Figure S4. HP35 and dsDNA binding to C3N4 nanosheet. (a, c) The final binding conformations of HP35 protein and dsDNA to C3N4 nanosheet. (b, d) The CoM tracks of HP35 and dsDNA binding to C3N4 nanosheet.

Table S1. Structural influences of biomolecules binding onto 2D nanomaterials.

| <b>2D Material</b>                      | <b>biomolecule</b>                              | <b>consequences</b>                                      | <b>Ref.</b> |
|-----------------------------------------|-------------------------------------------------|----------------------------------------------------------|-------------|
| graphene                                | HP35 protein                                    | potential unfolding                                      | 1           |
| Carboxyl functionalized graphene defect | HP35 protein/WW domain                          | robust unfolding                                         | 2-3         |
| graphene oxide                          | protein G-related albumin-binding module (GA53) | no influence                                             | 4           |
| MoS <sub>2</sub>                        | HP35 protein/ $\alpha$ -helical polyalanine     | limited influence                                        | 5           |
| C <sub>2</sub> N                        | HP35 protein/double-stranded DNA                | no influence                                             | 6-7         |
| C <sub>3</sub> N <sub>4</sub>           | $\lambda$ -repressor protein                    | no influence                                             | This work   |
| C <sub>3</sub> N                        | HP35 protein                                    | robust unfolding                                         | 8           |
| phosphorene                             | HP35 protein                                    | No influence                                             | 9           |
| silicene                                | HP35 protein/A $\beta$ 1-42 fibrils             | No influence                                             | 10          |
| Pt nanocrystal                          | HP35 protein                                    | Unfolding on (111) facet but no influence on (100) facet | 11          |
| boron nitride                           | HP35 protein                                    | potential unfolding                                      | 12          |

## Reference

1. Zuo, G.; Zhou, X.; Huang, Q.; Fang, H.; Zhou, R., Adsorption of villin headpiece onto graphene, carbon nanotube, and c60: Effect of contacting surface curvatures on binding affinity. *J. Phys. Chem. C* **2011**, *115*, 23323-23328.
2. Gu, Z.; Song, W.; Chen, S. H.; Li, B. Y.; Li, W. F., et al., Defect-assisted protein hp35 denaturation on graphene. *Nanoscale* **2019**, *11* (41), 19362-19369.
3. Li, B. Y.; Bell, D. R.; Gu, Z. L.; Li, W. F.; Zhou, R. H., Protein ww domain denaturation on defective graphene reveals the significance of nanomaterial defects in nanotoxicity. *Carbon* **2019**, *146*, 257-264.
4. Chen, J. L.; Wang, X. G.; Dai, C. Q.; Chen, S. D.; Tu, Y. S., Adsorption of ga module onto graphene and graphene oxide: A molecular dynamics simulation study. *Physica E* **2014**, *62*, 59-63.
5. Gu, Z.; De Luna, P.; Yang, Z.; Zhou, R., Structural influence of proteins upon adsorption to mos2 nanomaterials: Comparison of mos2 force field parameters. *Phys. Chem. Chem. Phys.* **2017**, *19* (4), 3039-3045.
6. Gu, Z.; Zhao, L.; Liu, S.; Duan, G.; Perez-Aguilar, J. M., et al., Orientational binding of DNA guided by the c2n template. *ACS Nano* **2017**, *11* (3), 3198-3206.
7. Li, B.; Li, W.; Perez-Aguilar, J. M.; Zhou, R., Mild binding of protein to c2 n monolayer reveals its suitable biocompatibility. *Small* **2017**, *16* 3685.
8. Gu, Z. L.; Perez-Aguilar, J. M.; Meng, L. J.; Zhou, R. H., Partial denaturation of villin headpiece upon binding to a carbon nitride polyaniline (c3n) nanosheet. *J. Phys. Chem. B* **2020**, *124* (35), 7557-7563.
9. Zhang, W.; Huynh, T.; Xiu, P.; Zhou, B.; Ye, C., et al., Revealing the importance of surface morphology of nanomaterials to biological responses: Adsorption of the villin headpiece onto graphene and phosphorene. *Carbon* **2015**, *94*, 895-902.
10. Meng, Y. J.; Liu, R. R.; Song, L. T.; Zhu, M.; Zhai, H. L., et al., Exploring the effect of silicene monolayer on the structure and function of villin headpiece and amyloid fibrils by molecular dynamics simulations. *Proteins* **2021**, *89*, 107-115.
11. Liu, S. T.; Yin, X. H.; Zhou, H.; Zhou, B.; Shao, Q. W., et al., Different platinum crystal surfaces show very distinct protein denaturation capabilities. *Nanoscale* **2019**, *11* (41), 19352-19361.

12. Luo, M.; Yu, Y.; Jin, Z.; Dong, H. L.; Li, Y. Y., Multi-scale simulations on biocompatibility of boron nitride nanomaterials with different curvatures: A comparative study. *Appl. Surf. Sci.* **2020**, *517*, 146181.
13. Kang, Y.; Li, X.; Tu, Y. Q.; Wang, Q.; Agren, H., On the mechanism of protein adsorption onto hydroxylated and nonhydroxylated tio<sub>2</sub> surfaces. *J. Phys. Chem. C* **2010**, *114* (34), 14496-14502.
